# Supplementary material
Source: Springer Nature journal article supplement (https://www.springermedizin.de/resource/supplementary/12902_2013_258_MOESM1_ESM.pdf/9515890)

A

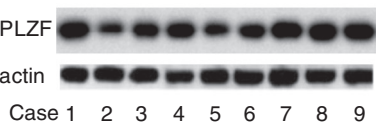

Normal

Adenomatous lesion

B

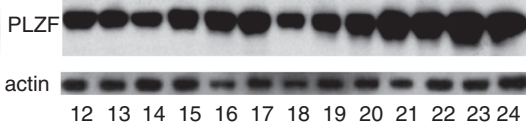

Papillary carcinoma

C

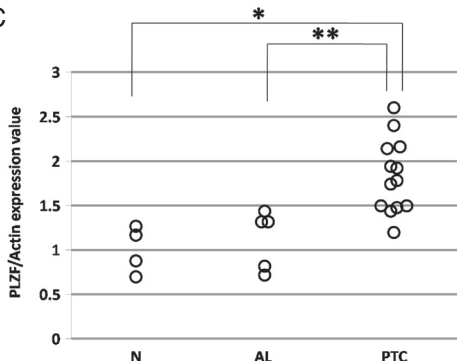

Supplement: MOESM1 [file 9515890]
